# Supplementary material for: Impact of Large Power Transformer Bushing Seismic Vulnerability on the Electrical Grid
Source: Research Square preprint supplement (doi:10.21203/rs.3.rs-7753894/v1), 2025-11-10
Supplement: Supplementary file 1 [file 77b8fbfff8b1f8ea2251bb84.pdf]

---

**Algorithm 1** Hazard-Informed Contingency Generation and Power-Flow Impact Analysis

---

**Require:** Grid model  $G = (\text{buses}, \text{branches}, \text{transformers } T, \text{substations } S)$ ; Hazard grid  $H$  with PGA values and cell spacing  $\Delta$ ; Amplification distributions  $A_c$  for voltage classes  $c$ ; Qualification threshold at bushing  $\theta_{\text{bush}} \in \{1.0g, 2.0g\}$ ; Overload trip threshold  $\rho \in \{1.25, 1.50\}$ ; Number of Monte Carlo samples  $S$ ; solver settings.

**Ensure:** Per-sample results  $R_s$  (failed assets, load not served, topology status); Aggregated statistics and per-asset failure frequencies.

```
1: Initialize  $R \leftarrow \emptyset$ , and failure counters  $\phi[i] \leftarrow 0$  for all  $i \in T$ 
2: // Map hazard to assets
3:  $T^* \leftarrow \emptyset$ 
4: for each transformer  $i \in T$  do
5:   Locate nearest hazard cell to  $(\text{lat}_i, \text{lon}_i)$  and obtain  $\text{PGA}_{\text{site}}[i]$ 
6:   if distance to cell  $\leq \Delta$  then
7:      $T^* \leftarrow T^* \cup \{i\}$ 
8:   else
9:     mark  $i$  as “out of coverage”
10:  end if
11: end for
12: for  $s = 1 \rightarrow S$  do ▷ Monte Carlo loop
13:    $F \leftarrow \emptyset$  ▷ Initialize failure transformer set
14:   for each  $i \in T^*$  do
15:     Determine voltage class  $c(i)$ 
16:     Draw  $\text{amp\_ratio}[i] \sim A_{c(i)}$  ▷ bushing/base amplification
17:      $\text{PGA}_{\text{bush}}[i] \leftarrow \text{PGA}_{\text{site}}[i] \times \text{amp\_ratio}[i]$ 
18:     if  $\text{PGA}_{\text{bush}}[i] \geq \theta_{\text{bush}}$  then
19:        $F \leftarrow F \cup \{i\}$ ;  $\phi[i] \leftarrow \phi[i] + 1$ 
20:     end if
21:   end for
22:   // Contingency setup
23:   Apply outages in  $G$  corresponding to transformers in  $F$ 
24:   // AC power-flow with overload-trip monitors
25:    $\text{status} \leftarrow \text{Solve power-flow on } G$ 
26:    $\text{iter} \leftarrow 0$ 
27:   while  $\text{status} = \text{CONVERGED}$  and any element loading  $> \rho$  do
28:     Trip violating element(s) according to policy
29:      $\text{status} \leftarrow \text{Re-solve power-flow on updated topology}$ 
30:      $\text{iter} \leftarrow \text{iter} + 1$ 
31:     if  $\text{iter} \geq \text{MaxMonitorIters}$  then
32:       break
33:     end if
34:   end while
35:   // Extract impact metrics
36:    $L_s \leftarrow \text{total load not served (MW)}$ 
37:    $K_s \leftarrow \text{number of tripped elements}$ 
38:    $I_s \leftarrow \text{identify islands and de-energized areas}$ 
39:    $R \leftarrow R \cup \{(s, F, \text{status}, L_s, K_s, I_s)\}$ 
40: end for
41: // Aggregate statistics
42: for each  $i \in T^*$  do
43:    $\text{failure\_frequency}[i] \leftarrow \phi[i]/S$ 
44: end for
45: Compute distributions of  $\{L_s\}$ ,  $\{K_s\}$ , and spatial maps from  $\{I_s\}$ 
46: return  $R$ ,  $\text{failure\_frequency}$ 
```

---

---

**Algorithm 2** Streamlined Hazard-Informed Contingency and Power-Flow Simulation

---

**Require:** Grid model  $G$ , hazard grid  $H$  with PGA values and spacing  $\Delta$ , amplification distributions  $A_c$ , bushing threshold  $\theta_{\text{bush}}$ , overload limit  $\rho$ , and number of Monte Carlo samples  $S$ .

**Ensure:** Per-sample outcomes  $R_s$  and per-transformer failure frequencies.

```
1: Initialize result container  $R$  and counters  $\phi[i]=0$  for all transformers.

2: // Step 1: Map hazard intensity to assets
3: for each transformer  $i$  in  $G$  do
4:   Locate nearest hazard cell to  $(\text{lat}_i, \text{lon}_i)$  and get  $\text{PGA}_{\text{site}}[i]$ 
5:   if distance  $\leq \Delta$  then mark  $i$  as covered;
6:   else mark as “out of range”
7:   end if
8: end for

9: // Step 2: Monte Carlo sampling of component failures
10: for  $s = 1 \rightarrow S$  do ▷ Each sample = one possible event scenario
11:    $F \leftarrow \emptyset$  ▷ Initialize failed-transformer set
12:   for each covered transformer  $i$  do
13:     Draw amplification  $\text{amp\_ratio}[i] \sim A_{c(i)}$  by voltage class
14:     Compute  $\text{PGA}_{\text{bush}}[i] = \text{PGA}_{\text{site}}[i] \times \text{amp\_ratio}[i]$ 
15:     if  $\text{PGA}_{\text{bush}}[i] \geq \theta_{\text{bush}}$  then
16:       Add  $i$  to  $F$  and increment  $\phi[i]$ 
17:     end if
18:   end for
19:   Apply outages in  $G$  corresponding to  $F$  ▷ Contingency realization

20: // Step 3: Power-flow analysis with overload checks
21: Solve AC power-flow on updated network using Newton–Raphson
22: while solution converged and any element loading  $> \rho$  do
23:   Trip overloaded elements; re-solve power-flow
24: end while

25: // Step 4: Record scenario-level impacts
26: Measure  $L_s = \text{load not served}$ ,  $K_s = \text{elements tripped}$ ,  $I_s = \text{islands formed}$ 
27: Store results  $R \leftarrow R \cup \{(s, F, L_s, K_s, I_s)\}$ 
28: end for

29: // Step 5: Aggregate statistics across all samples
30: for each transformer  $i$  do
31:   Compute  $\text{failure\_frequency}[i] = \phi[i]/S$ 
32: end for
33: Summarize  $\{L_s, K_s, I_s\}$  for system-level performance metrics
34: return  $R$ , failure_frequency
```

---

---

**Algorithm 3** Simplified Workflow for Hazard-Driven Grid Impact Simulation

---

**Require:** Grid model  $G$ , hazard grid  $H$  (PGA, spacing  $\Delta$ ), amplification distributions  $A_c$ , bushing threshold  $\theta_{\text{bush}}$ , overload threshold  $\rho$ , and number of Monte Carlo samples  $S$ .

**Ensure:** Scenario outcomes  $R_s$  and per-transformer failure frequencies.

- 1: Initialize result container  $R$  and counters  $\phi[i]=0$  for all transformers  $i$ .
  - 2: Map each transformer to nearest hazard cell; keep only assets within coverage.
  - 3: **for**  $s = 1 \rightarrow S$  **do** ▷ Monte Carlo realizations
  - 4:     Sample amplification  $\text{amp\_ratio}[i] \sim A_{c(i)}$  for each transformer.
  - 5:     **if**  $\text{PGA}_{\text{site}}[i] \times \text{amp\_ratio}[i] \geq \theta_{\text{bush}}$  **then** mark  $i$  as failed.
  - 6:     **end if**
  - 7:     Apply outages for failed transformers; run AC power-flow on updated  $G$ .
  - 8:     **while** any element loading  $> \rho$  and convergence maintained **do**
  - 9:         Trip overloaded elements and re-solve power-flow.
  - 10:     **end while**
  - 11:     Record  $L_s$  (load lost),  $K_s$  (tripped elements), and  $I_s$  (islands).
  - 12: **end for**
  - 13: Compute per-asset failure\_frequency $[i] = \phi[i]/S$ .
  - 14: Aggregate results  $\{L_s, K_s, I_s\}$  for system-level impact analysis.
-
