# Supplementary material for: Impact of Large Power Transformer Bushing Seismic Vulnerability on the Electrical Grid
Source: Research Square preprint supplement (doi:10.21203/rs.3.rs-7753894/v1), 2025-11-10
Supplement: Supplementary file 1 [file e5a124a0797956880f0a8fa7.docx]

**Supplementary information -** **Impact of Large Power Transformer Bushing Seismic Vulnerability on the Electrical Grid**

The following tables present the different parameters used for modeling the 138 kV and 345 kV transformers in both SAP2000 and MOOSE for this study.

Table 4. 138kV Tank and Turret Parameters.

| **XFO** |  | **Tank (kg, m, Hz)** | | | | | | **Turret** | | | | |
| --- | --- | --- | --- | --- | --- | --- | --- | --- | --- | --- | --- | --- |
|  | **Total Mass (kg)** | **F1(Hz)** | **F2(Hz)** | **Mass (kg)** | **L (m)** | **W (m)** | **H (m)** | **Length (m)** | **Mass (kg)*** | **Diameter (m)** | **F (Hz)** | **Wall Thickness (mm)** |
| 1 | 313600 | 8.77 | 9.75 | 311902 | 6.17 | 2.17 | 3.60 | 1.48 | 464 | 0.60 | 16.54 | 8 |
| 2 | 443300 | 7.00 | 7.53 | 438763 | 9.85 | 3.20 | 4.12 | 1.99 | 1234.5 | 0.65 | 4.70 | 9 |
| 3 | 73300 | 3.63 | 12.63 | 72460 | 4.56 | 2.02 | 3.17 | 0.30 | 162 | 0.28 | 12.67 | 6.35 |

Table 5. 138kV Bushing Parameters

| **XFO** | **Bushing** | | | | | |
| --- | --- | --- | --- | --- | --- | --- |
|  | **Mass (kg)** | **Fixed F (Hz)** | **Mounted F (Hz)** | **Air Side Length (m)** | **Air-Side COG (m)** | **Air-Side M (kg)** |
| 1 | 151.5 | 33.34 | 16.54 | 1.42 | 0.62 | 102 |
| 2 | 413.0 | 33.55 | 4.70 | 1.88 | 0.86 | 278 |
| 3 | 170 | 27.63 | 12.67 | 1.69 | 0.69 | 118 |

Table 6. 345kV Tank and Turret Parameters.

| **XFO** |  | **Tank (kg, m, Hz)** | | | | | | **Turret** | | | | |
| --- | --- | --- | --- | --- | --- | --- | --- | --- | --- | --- | --- | --- |
|  | **Total Mass (kg)** | **F1(Hz)** | **F2(Hz)** | **Mass (kg)** | **L (m)** | **W (m)** | **H (m)** | **Length (m)** | **Mass (kg)*** | **Diameter (m)** | **F (Hz)** | **Wall Thickness (mm)** |
| 1 | 441600 | 4.97 | 8.71 | 433713 | 8.20 | 2.90 | 4.54 | 2.19 | 2210 | 0.90 | 4.24 | 9 |
| 2 | 232500 | 5.26 | 2.43 | 227601 | 9.88 | 2.32 | 3.50 | 1.18 | 1214 | 0.79 | 4.77 | 6 |
| 3 | 290300 | 8.41 | 10.29 | 288399 | 7.12 | 3.32 | 4.17 | 1.43 | 1437 | 1.00 | 15.80 | 5 |
| 4 | 373200 | 8.62 | 17.06 | 371363 | 9.00 | 3.92 | 3.76 | 1.96 | 1467 | 0.83 | 10.72 | 6 |
| 5 | 422000 | 3.83 | 4.50 | 418955 | 9.00 | 8.00 | 4.50 | 0.71 | 596 | 0.70 | 4.07 | 6.35 |
| 7 | 104000 | 9.69 | 17.12 | 96395 | 4.96 | 1.95 | 3.10 | 3.05 | 2116 | 0.82 | 9.69 | 9.53 |
| 8 | 164000 | 4.90 | 6.93 | 160013 | 5.80 | 2.30 | 3.76 | 1.79 | 957 | 0.91 | 6.46 | 6 |
| 9 | 443000 | 7.40 | 7.73 | 435068 | 9.04 | 3.20 | 4.40 | 2.22 | 2225 | 0.90 | 5.60 | 9 |

.

Table 7. 345kV Bushing Parameters

| **XFO** | **Bushing** | | | | | |
| --- | --- | --- | --- | --- | --- | --- |
|  | **Mass (kg)** | **Fixed F (Hz)** | **Mounted F (Hz)** | **Air Side Length (m)** | **Air-Side COG (m)** | **Air-Side M (kg)** |
| 1 | 572 | 13.74 | 4.54 | 3.51 | 1.70 | 419 |
| 2 | 572 | 13.74 | 7.31 | 3.51 | 1.69 | 419 |
| 3 | 656 | 4.18 | 3.66 | 3.83 | 2.25 | 464 |
| 4 | 470 | 4.79 | 4.20 | 3.72 | 1.71 | 370 |
| 5 | 572 | 13.74 | 4.46 | 3.51 | 1.70 | 419 |
| 6 | 515 | 14.71 | 11.69 | 3.51 | 1.70 | 419 |
| 7 | 490 | 14.80 | 6.31 | 3.30 | 1.58 | 372 |
| 8 | 572 | 13.74 | 6.01 | 3.51 | 1.70 | 419 |
